# Supplementary material for: Induced fit with replica exchange improves protein complex structure prediction
Source: PLOS journal article supplement (doi:10.1371/journal.pcbi.1010124), 2022-06-03
Supplement: S9 (10.1371/journal.pcbi.1010124.s009) [file journal.pcbi.1010124.s009]

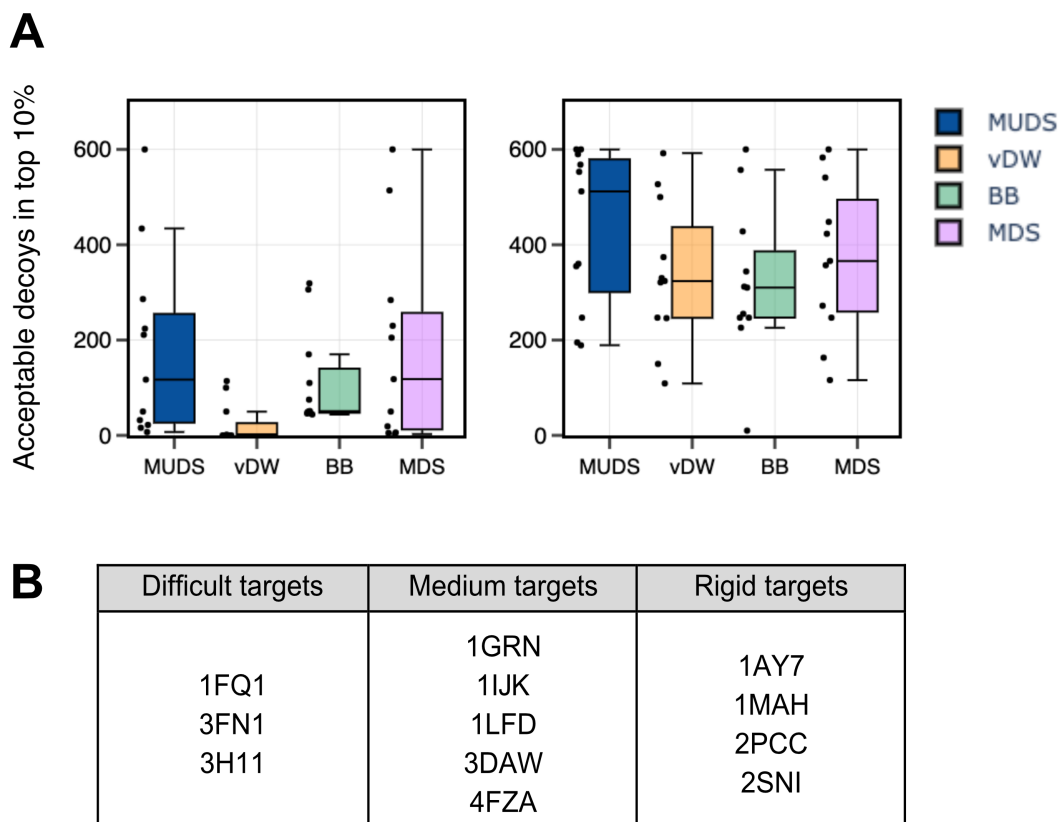

**Fig. S6. A. Near-native enrichment** for two different weights based on MUDS. Each score-term is represented with the boxplot illustrating the enrichment of CAPRI-quality acceptable models within the lowest-scoring 1,000 models out of a set of 10,000 (10%) for each of the 11 protein-protein complexes. The motif-dock score corresponds to the score function defined in *Marze et al.* (13). Motif Updated Dock Score(MUDS) *in blue* (as defined prior) comprises of Van der Waals score terms(attractive and repulsive clash terms) *in pale orange* and Backbone statistical terms( $r_{\text{ama}}$ ,  $p_{\text{aa\_pp}}$  and  $\omega_{\text{ga}}$ ) *in pale green* along with the motif-dock score *in purple*. (left) Represents reduced weights of 0.1X to the Van der Waals and the backbone score terms, where X is the standard weight as defined by  $\text{beta\_nov16}$ . (right) Represents a weight of 1.0X to the score-terms where X is the standard weight defined by the  $\text{beta\_nov16}$  score-function. Sampling performance is improved almost three-fold for all 11 targets by improved weights. B. Distribution of protein targets to compare scoring performance
