# Supplementary material for: Induced fit with replica exchange improves protein complex structure prediction
Source: PLOS journal article supplement (doi:10.1371/journal.pcbi.1010124), 2022-06-03
Supplement: S19 (10.1371/journal.pcbi.1010124.s019) [file journal.pcbi.1010124.s019]

# ReplicaDock 2.0

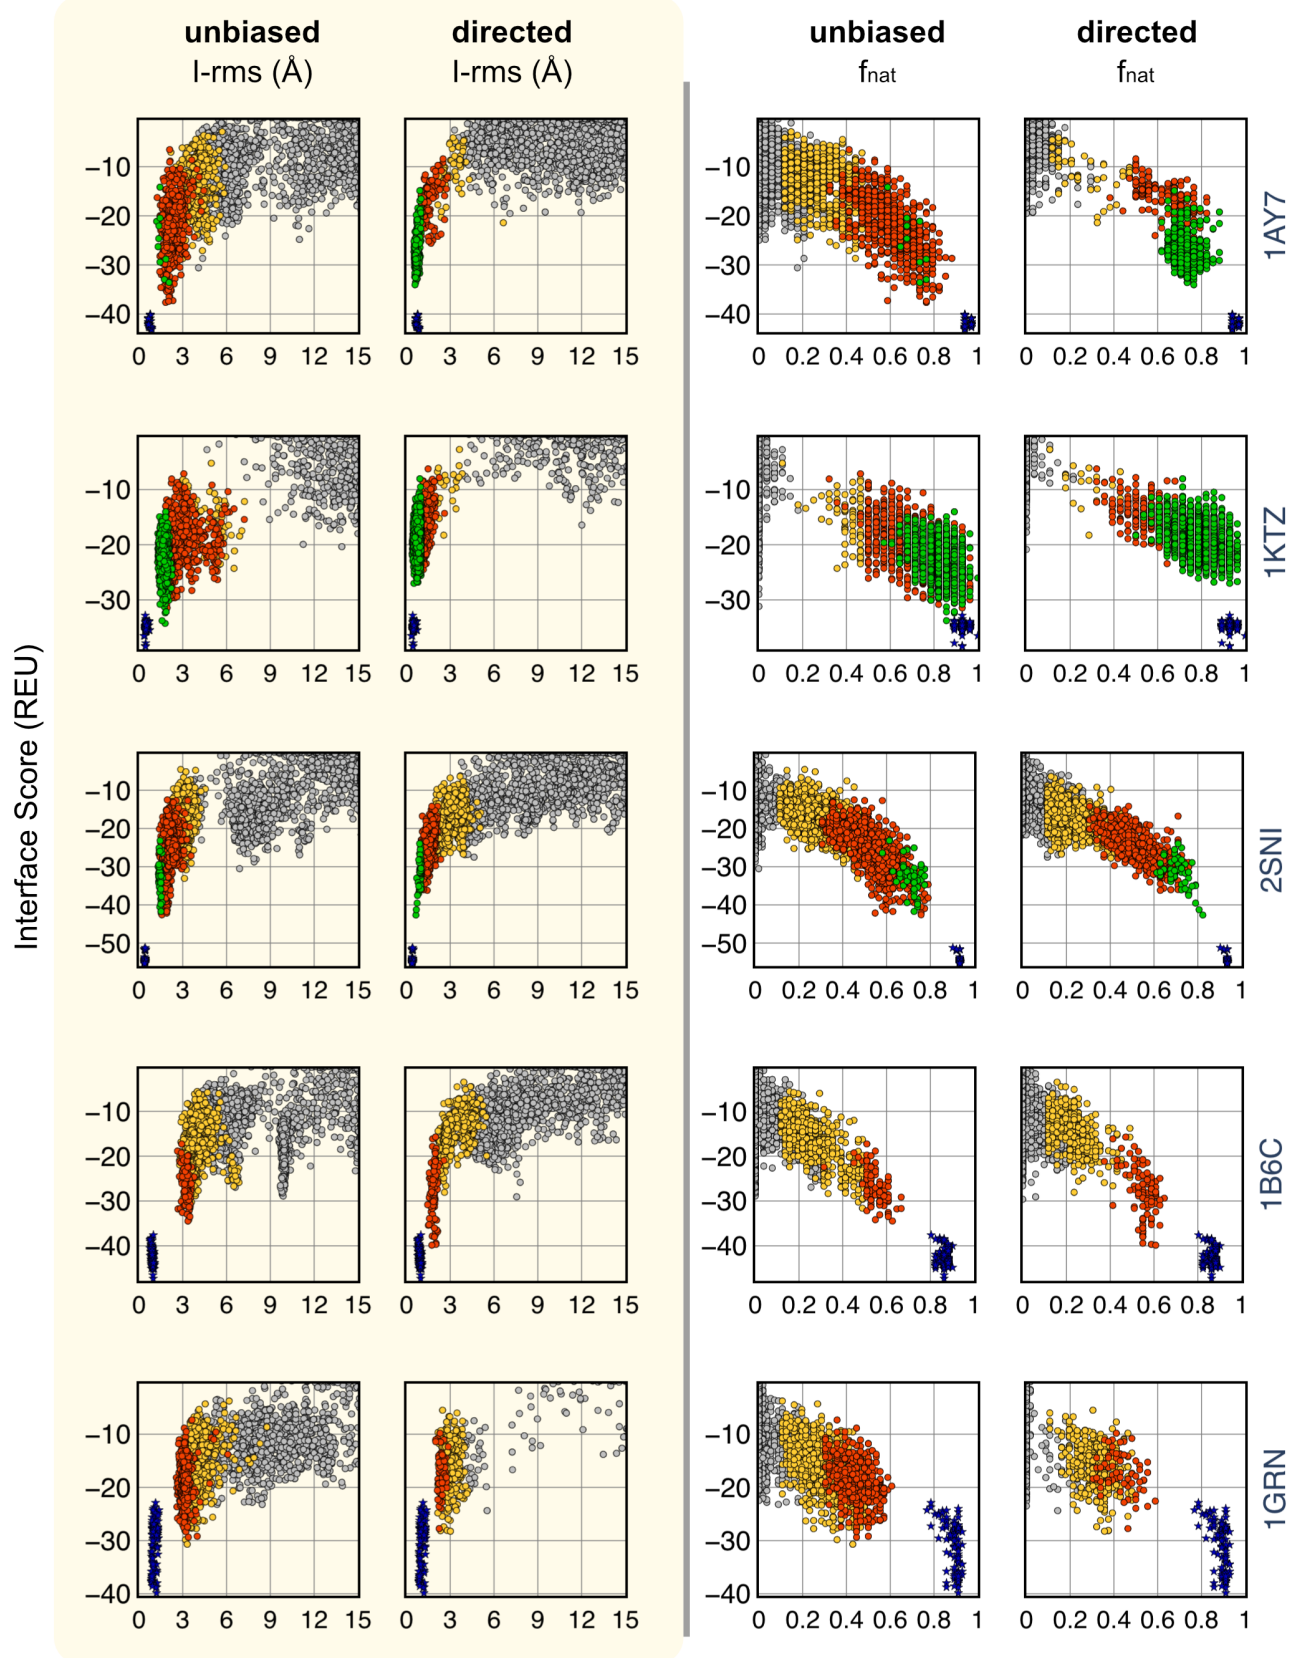

# ReplicaDock 2.0

Interface Score (REU)

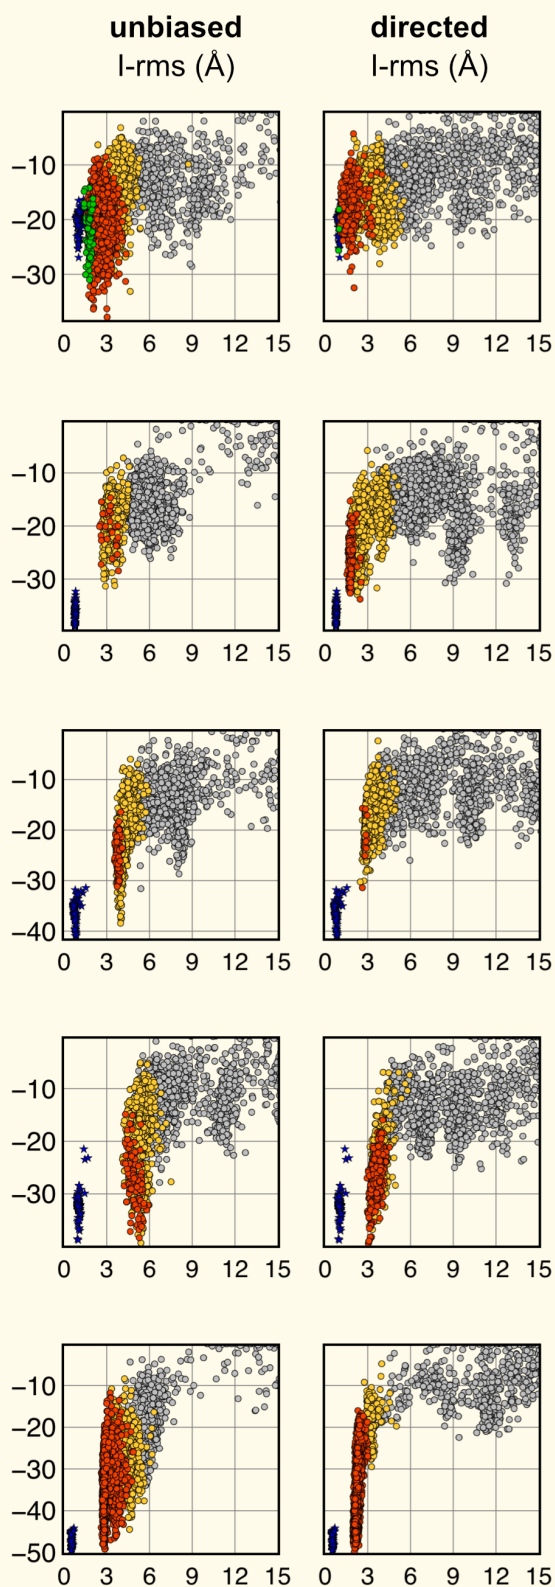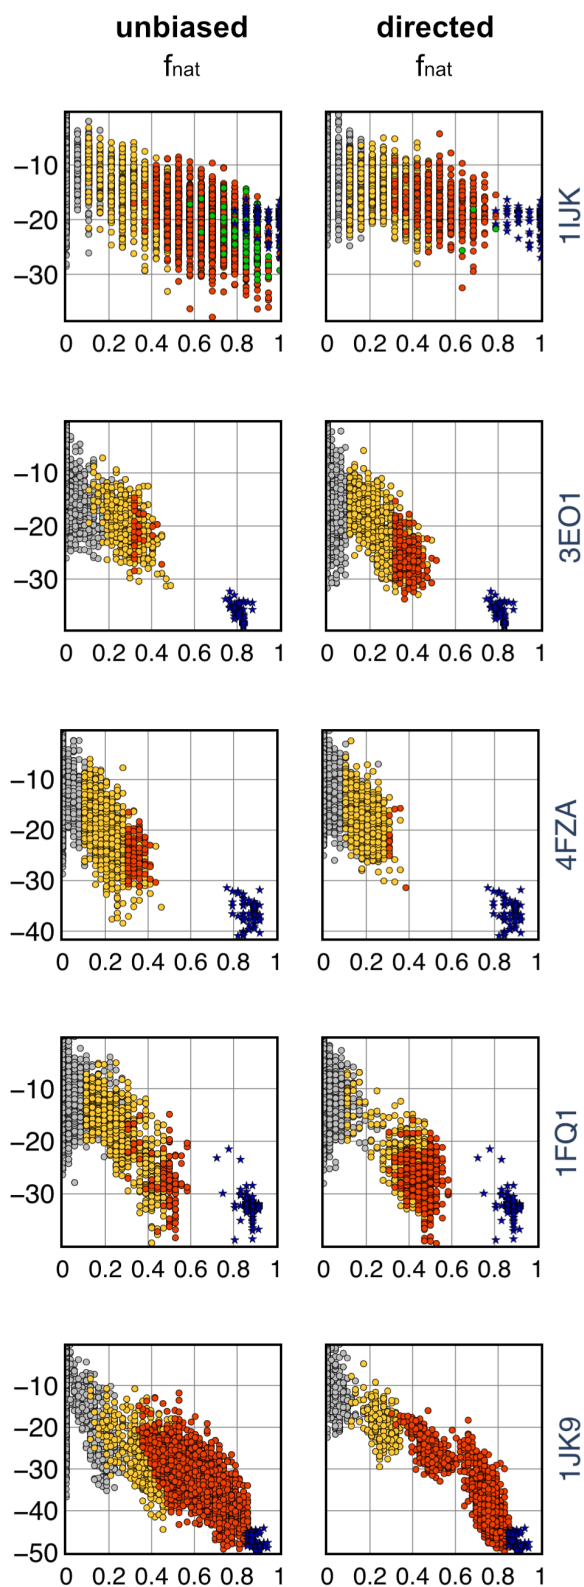

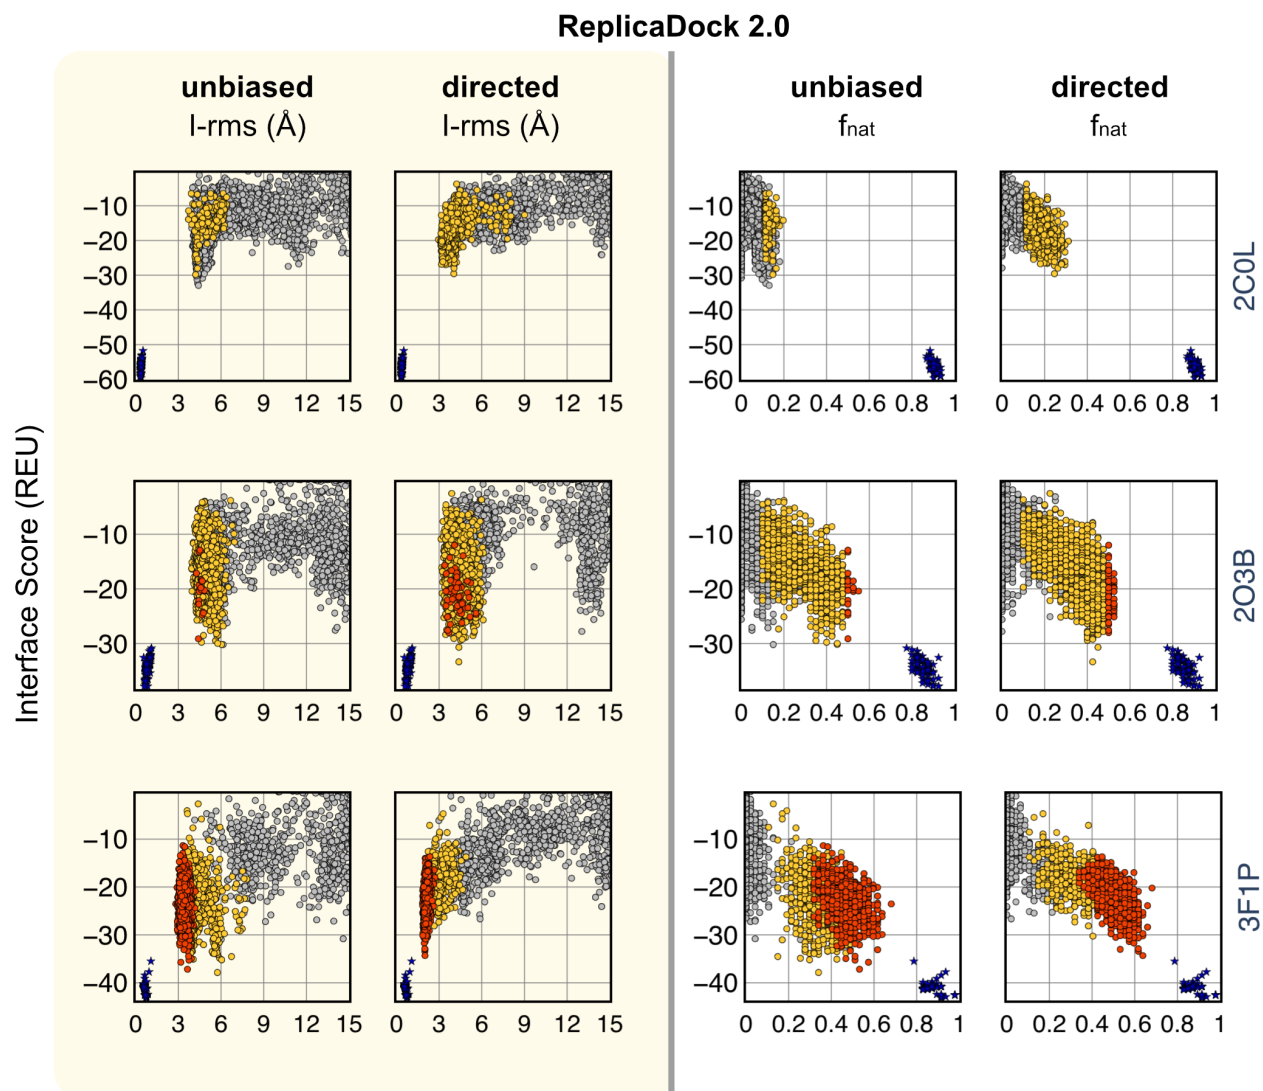

**Fig. S16.** Interface Score versus Interface-RMSD(Å) plots and Interface Score versus  $f_{\text{nat}}$  plots after the complete protocol with RosettaDock 4.0 and with directed induced-fit sampling for ReplicaDock 2.0 for benchmark 5.0 targets.
